# Supplementary material for: Unpaid Informal Caregivers in South Australia: Population Characteristics, Prevalence and Age-Period-Cohort Effects 1994–2014
Source: PubMed Central journal article supplement (PMC5029908; doi:10.1371/journal.pone.0161994), 2016-09-20
Supplement: pone.0161994.s001.pdf [file pone.0161994.s001.pdf]

## **S1. Carer Questions (Health Omnibus Surveys 1994-2014)**

1994: Are you a carer of a dependent person? Yes / No ?

[A dependent person is someone who has a chronic condition that is unlikely to improve.  
A carer is responsible for the permanent care of that person on a long term basis.]

1998a: Are you a carer of a dependent person? Yes / No ?

[A dependent person is someone who has a chronic condition that is unlikely to improve.  
A carer is responsible for the permanent care of that person on a long term basis.]

2000 and

2001: Do you care at home for a parent, partner, child, other relative or friend who has a disability, is frail aged or who has a chronic mental or physical illness? Yes / No ?

2002: Are you a carer of a dependent person? Yes / No ?

[A dependent person is someone who has a chronic condition that is unlikely to improve.  
A carer is responsible for the permanent care of that person on a long term basis.]

2004a: Do you provide long term care at home for a parent, partner, child, other relative or friend who has a disability, is frail aged or who has a chronic mental or physical illness?

Yes / No ?

[Long term care is a minimum of 6 months and may extend into years]

2008a: Do you provide long term care at home for a parent, partner, child, other relative or friend who has a disability, is frail aged or who has a chronic mental or physical illness?

Yes / No ?

[Long term care is a minimum of 6 months and may extend into years]

2009 and

2010: Do you provide any ongoing care or assistance care at home to a relative, friend or neighbour who has a disability, is frail aged or who has a chronic illness including mental illness? Yes / No ?

2013 and

2014: Do you provide long term care at home for a parent, partner, child, other relative or friend who has a disability, is frail aged or who has a chronic mental or physical illness?

Yes / No ?

[Long term care is a minimum of 6 months and may extend into years]
